# Supplementary material for: Preparation conditions of NiS active material in high-boiling solvents for all-solid-state lithium secondary batteries
Source: Royal Society of Chemistry journal article supplement (doi:10.1039/c3nj01432k), 2014-01-01
Supplement: c3nj01432k1.pdf [file c3nj01432k1.pdf]

## Electronic Supplementary Information

### **Preparation conditions of NiS active material in high-boiling solvents for all-solid-state lithium secondary batteries**

Keigo Aso, Akitoshi Hayashi, and Masahiro Tatsumisago

Department of Applied Chemistry, Graduate School of Engineering,  
Osaka Prefecture University, 1-1 Gakuen-cho, Naka-ku, Sakai, Osaka 599-8531, Japan

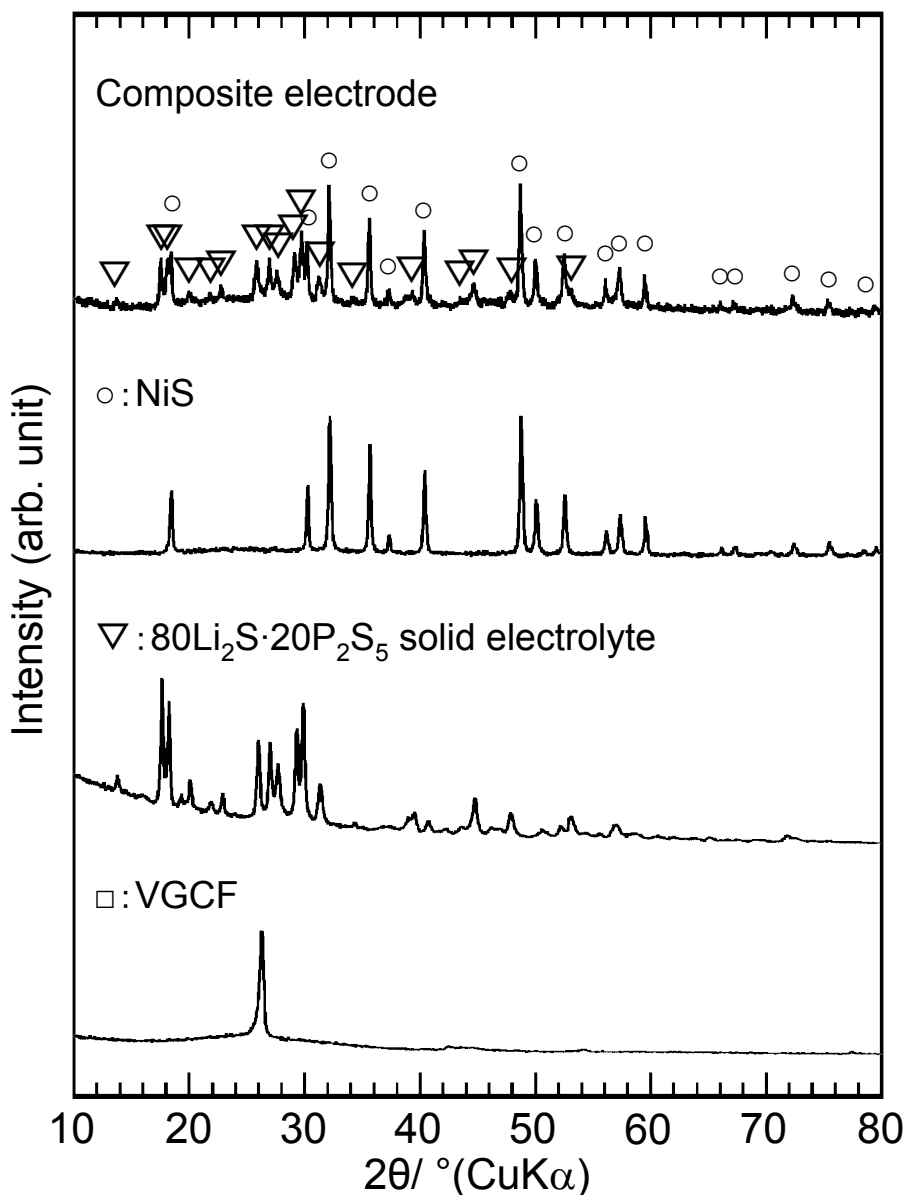

Fig. S1 XRD pattern of the composite electrode prepared by hand-grinding of a mixture of NiS nanoparticles, the 80Li<sub>2</sub>S·20P<sub>2</sub>S<sub>5</sub> solid electrolyte, and VGCF in a mortar. The patterns of NiS nanoparticles, the 80Li<sub>2</sub>S·20P<sub>2</sub>S<sub>5</sub> solid electrolyte, and VGCF are also shown.
